# Supplementary material for: Identification of the Effects of Chondroitin Sulfate on Inhibiting CDKs in Colorectal Cancer Based on Bioinformatic Analysis and Experimental Validation
Source: PubMed Central journal article supplement (PMC8477652; doi:10.3389/fonc.2021.705939), 2021-09-14
Supplement: Image_1.pdf [file Image_1.pdf]

*Supplementary Material*

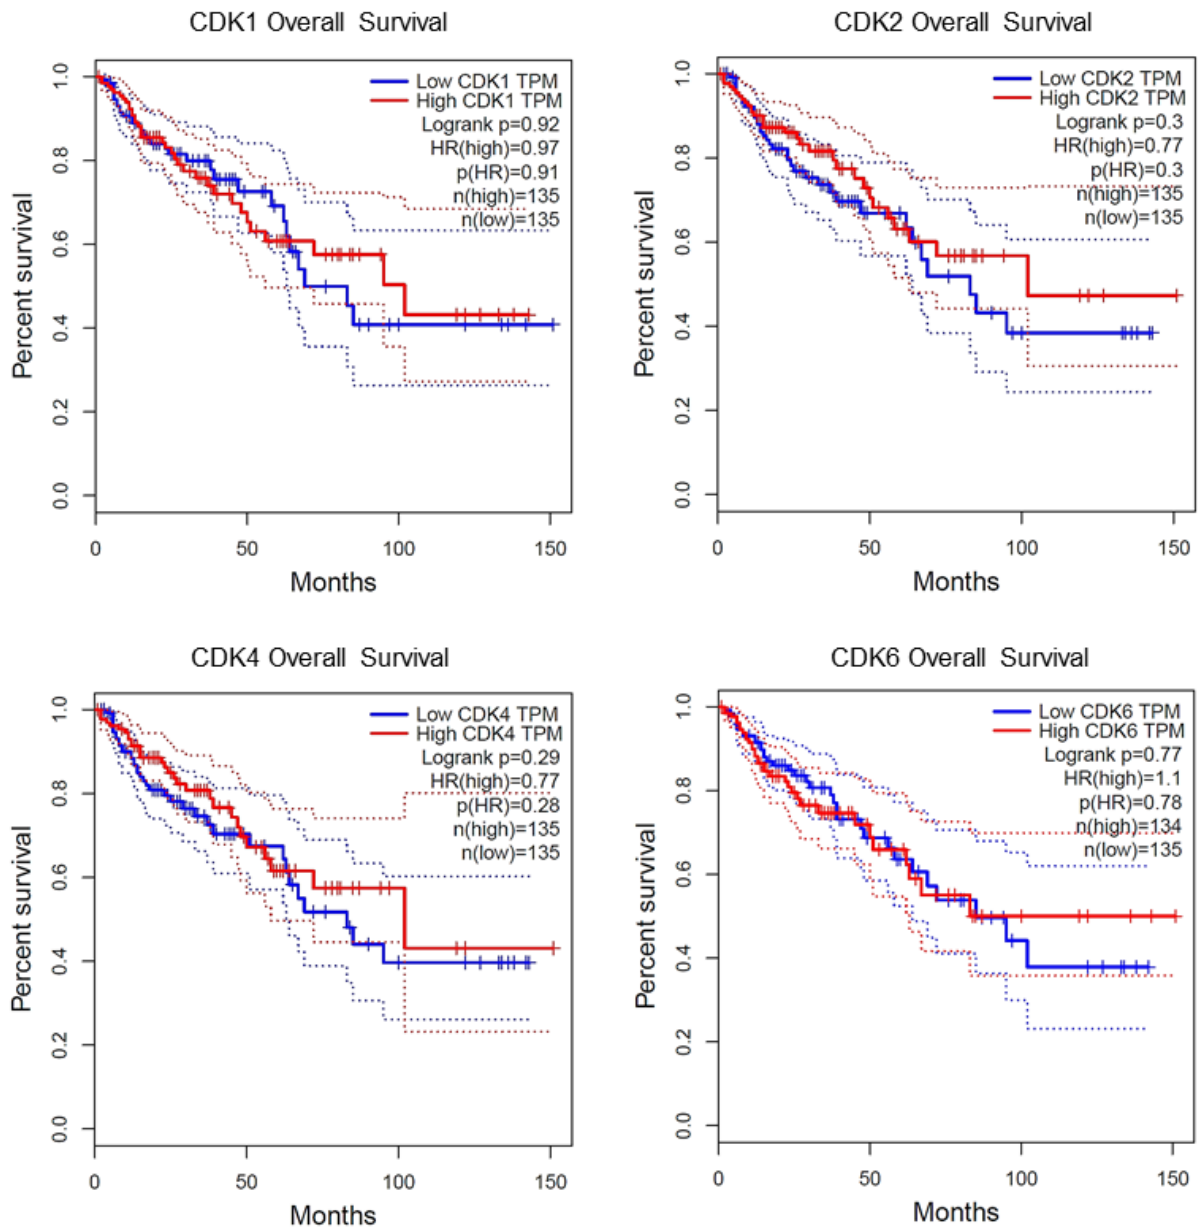

**Supplementary Figure 1.** Influences of the gene expression levels of CDK1, CDK2, CDK4 and CDK6 on the survival rate of patients (full lines are the overall survival, and dotted lines are the 95% confidence intervals).

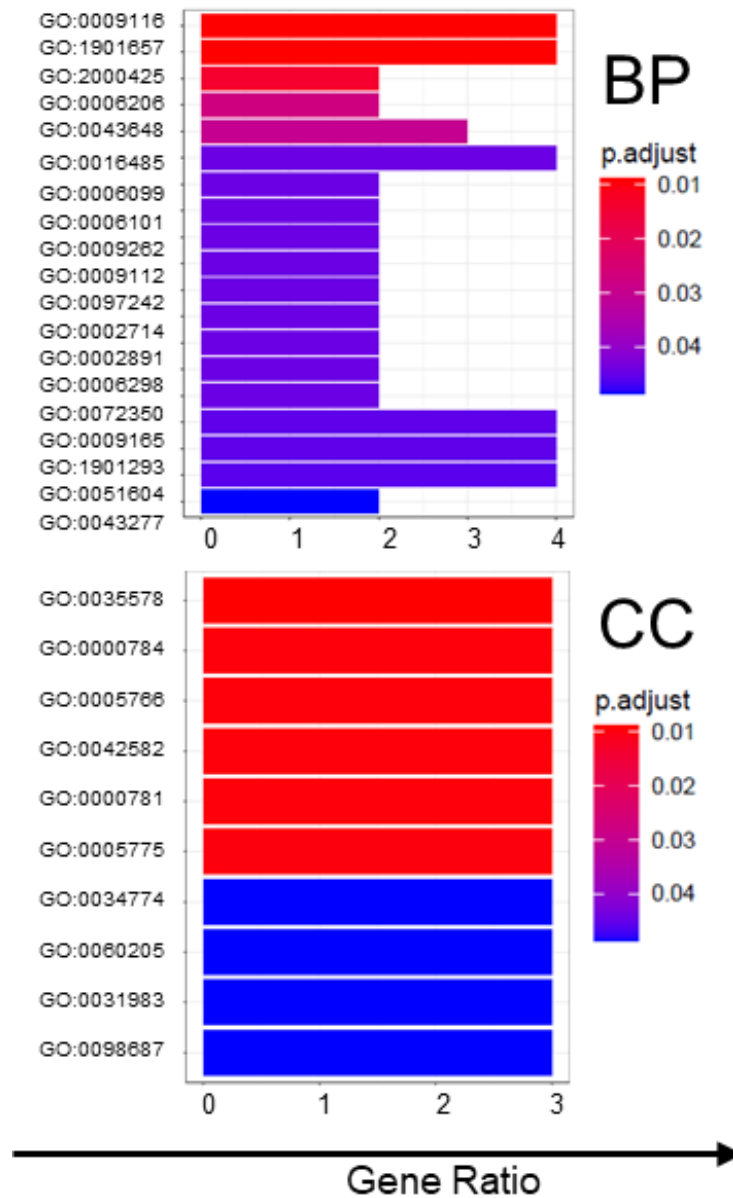

**Supplementary Figure 2.** GO biological process (BP) and cellular component (CC) prediction of CS on CRC-induced DEGs. All the GO descriptions are shown in **Supplementary Table 3** (*p.adjust*, *p*-value after correction; and Gene Ratio, the proportion of genes enriched in the biological processes).

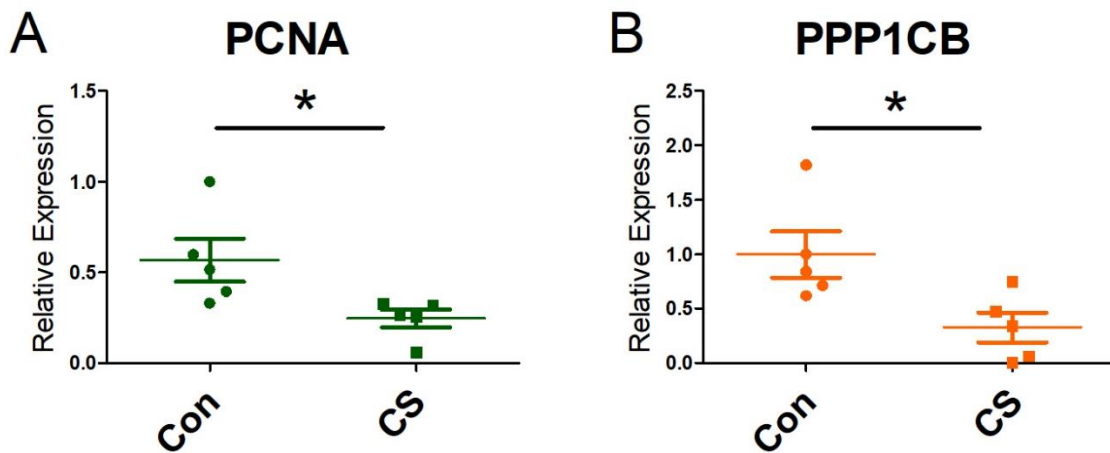

**Supplementary Figure 3.** Effects of CS on regulating the mRNA expression levels of PCNA and PPP1CB in HCT-16 cells (n=5). **(A)** PCNA mRNA expression level of HCT-16 cells. **(B)** PPP1CB mRNA expression level of HCT-16 cells. \* $p < 0.05$  versus 0  $\mu\text{g/ml}$  CS assessed using Student's  $t$ -test. The results represent one of two independent experiments with similar results.

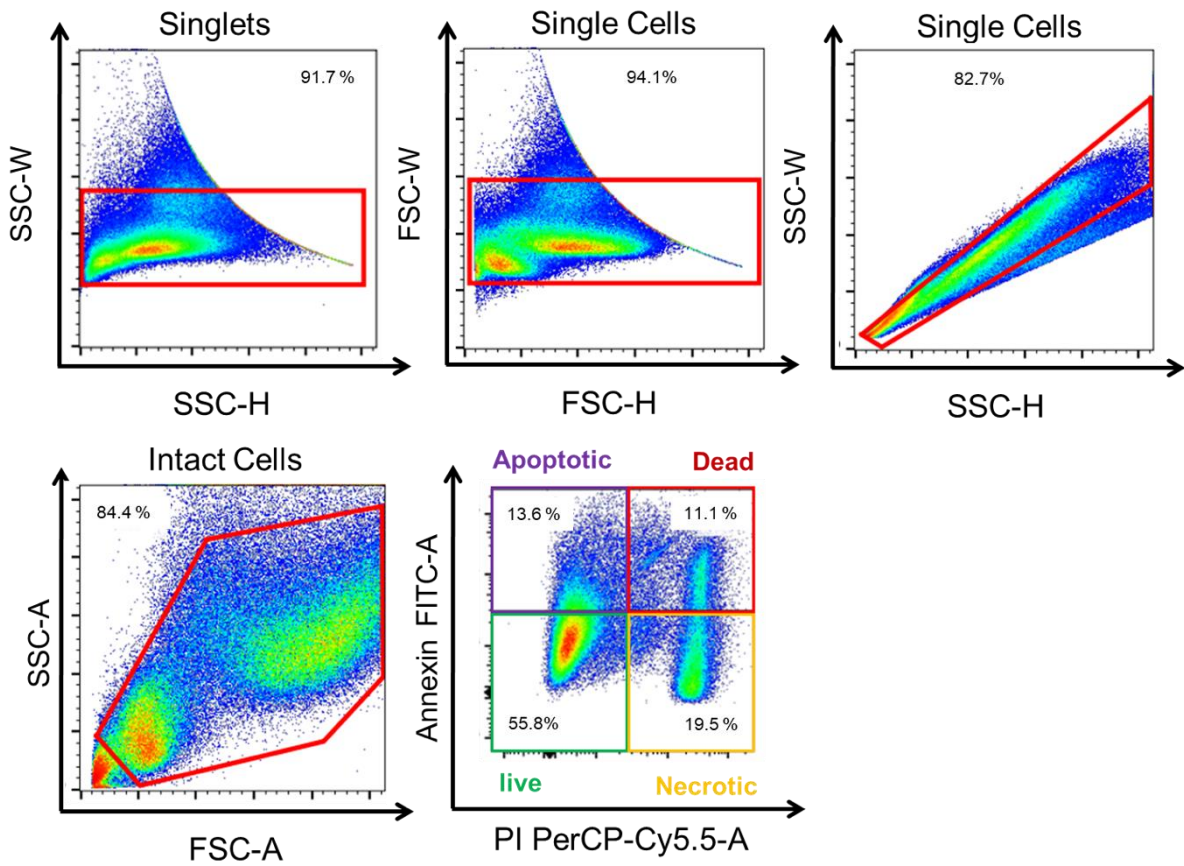

**Supplementary Figure 4.** Analysis of apoptosis using flow cytometry. FSC, forward scatter; and SSC, side scatter.

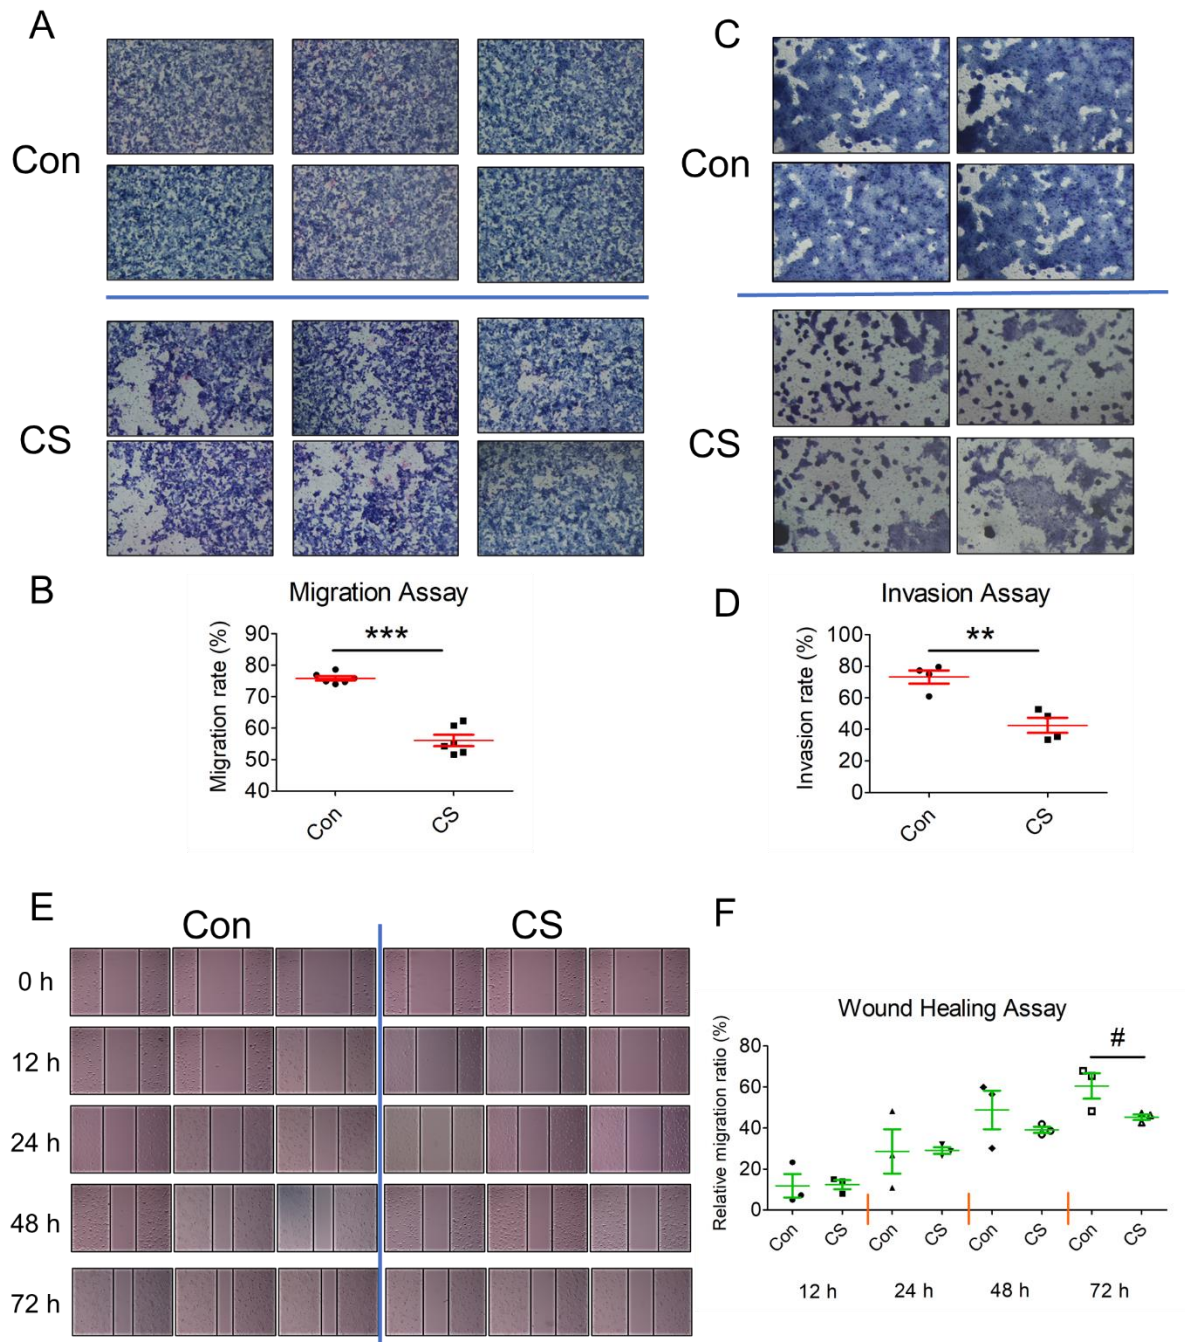

**Supplementary Figure 5.** Effects of CS on inhibiting the proliferation abilities of HCT-116 cells. **(A)** Photographs of migrated HCT-116 cells (magnification  $\times 40$ ). **(B)** CS inhibited the migration abilities of HCT-116 cells ( $n=6$ ). **(C)** Photographs of invaded HCT-116 cells (magnification  $\times 40$ ). **(D)** Inhibition of the invasion abilities of HCT-116 cells ( $n=6$ ). **(E)** Photographs of migrated HCT-116 cells in wound healing assay (magnification  $\times 40$ ). **(F)** Inhibition of the migration abilities of HCT-116 cells in wound healing assay ( $n=3$ ). The results are shown as the mean  $\pm$  SEM. #  $p < 0.1$ ; \*\*  $p < 0.01$ ; \*\*\*  $p < 0.001$  versus 0  $\mu\text{g/ml}$  CS assessed using Student's *t*-test. The results represented one of two independent experiments with similar results.
