# Supplementary material for: Identification of the Effects of Chondroitin Sulfate on Inhibiting CDKs in Colorectal Cancer Based on Bioinformatic Analysis and Experimental Validation
Source: PubMed Central journal article supplement (PMC8477652; doi:10.3389/fonc.2021.705939), 2021-09-14
Supplement: Table_1.pdf [file Table_1.pdf]

*Supplementary Material*

**Supplementary Table 1. Primer sequences for qPCR.**

| Targets | qPCR primers                                                                     |
|---------|----------------------------------------------------------------------------------|
| CDK1    | 5'-AAACTACAGGTCAAGTGGTAGCC-3' (forward)<br>5'-TCCTGCATAAGCACATCCTGA-3' (reverse) |
| CDK2    | 5'-CCAGGAGTTACTTCTATGCCTGA-3' (forward)<br>5'-TTCATCCAGGGGAGGTACAAC-3' (reverse) |
| CDK4    | 5'-ATGGCTACCTCTCGATATGAGC-3' (forward)<br>5'-CATTGGGGACTCTCACACTCT-3' (reverse)  |
| CDK6    | 5'-GCTGACCAGCAGTACGAATG-3' (forward)<br>5'-GCACACATCAAACAACCTGACC-3' (reverse)   |
| PPP1CB  | 5'-TGTCCCTGATACAGGTTTGCT-3' (forward)<br>5'-AACTCGCCACAGTAATTTGGG-3' (reverse)   |
| PCNA    | 5'-CCTGCTGGGATATTAGCTCCA-3' (forward)<br>5'-CAGCGGTAGGTGTCTGAAGC-3' (reverse)    |

**Supplementary Table 2.** Univariate analysis of the correlation of the CDK family with overall survival among colorectal cancer patients.

| Elements    | HR      | HR.95L  | HR.95H  | <i>p</i> -value |
|-------------|---------|---------|---------|-----------------|
| age         | 1.02987 | 1.00509 | 1.05526 | 1.79E-02        |
| gender      | 0.88771 | 0.52653 | 1.49669 | 6.55E-01        |
| tumor stage | 2.50188 | 1.85077 | 3.38205 | 2.48E-09        |
| T           | 2.92672 | 1.74213 | 4.91678 | 4.97E-05        |
| M           | 5.22594 | 3.06475 | 8.91115 | 1.25E-09        |
| N           | 2.17526 | 1.60888 | 2.94101 | 4.41E-07        |
| CDK1        | 1.13618 | 0.80529 | 1.60304 | 4.67E-01        |
| CDK2        | 1.26568 | 0.68008 | 2.35553 | 4.57E-01        |
| CDK4        | 1.12616 | 0.68241 | 1.85849 | 6.42E-01        |
| CDK6        | 1.40469 | 0.92881 | 2.12440 | 1.07E-01        |

HR, hazard ratio; HR.95L, lower limit of 95% confidence interval; and HR.95H, upper limit of 95% confidence interval

---

**Supplementary Table 3. GO description.**

| GO ID      | Description                                                    |
|------------|----------------------------------------------------------------|
| GO:0009116 | nucleoside metabolic process                                   |
| GO:1901657 | glycosyl compound metabolic process                            |
| GO:2000425 | regulation of apoptotic cell clearance                         |
| GO:0006206 | pyrimidine nucleobase metabolic process                        |
| GO:0043648 | dicarboxylic acid metabolic process                            |
| GO:0016485 | protein processing                                             |
| GO:0006099 | tricarboxylic acid cycle                                       |
| GO:0006101 | citrate metabolic process                                      |
| GO:0009262 | deoxyribonucleotide metabolic process                          |
| GO:0009112 | nucleobase metabolic process                                   |
| GO:0097242 | amyloid-beta clearance                                         |
| GO:0002714 | positive regulation of B cell mediated immunity                |
| GO:0002891 | positive regulation of immunoglobulin mediated immune response |
| GO:0006298 | mismatch repair                                                |
| GO:0072350 | tricarboxylic acid metabolic process                           |
| GO:0009165 | nucleotide biosynthetic process                                |
| GO:1901293 | nucleoside phosphate biosynthetic process                      |
| GO:0051604 | protein maturation                                             |
| GO:0043277 | apoptotic cell clearance                                       |
| GO:0035578 | azurophil granule lumen                                        |
| GO:0000784 | nuclear chromosome, telomeric region                           |
| GO:0005766 | primary lysosome                                               |
| GO:0042582 | azurophil granule                                              |
| GO:0000781 | chromosome, telomeric region                                   |
| GO:0005775 | vacuolar lumen                                                 |
| GO:0034774 | secretory granule lumen                                        |
| GO:0060205 | cytoplasmic vesicle lumen                                      |
| GO:0031983 | vesicle lumen                                                  |
| GO:0098687 | chromosomal region                                             |

---
